# Supplementary material for: Arene-perfluoroarene interactions in crystal engineering: structural preferences in polyfluorinated tolans
Source: Royal Society of Chemistry journal article supplement (doi:10.1039/b314094f), 2004-01-01
Supplement: b314094f.pdf [file b314094f.pdf]

## **Arene–Perfluoroarene Interactions in Crystal Engineering 9: Structural Preferences in Polyfluorinated Tolans<sup>†</sup>**

Caroline E. Smith,<sup>a</sup> Philip S. Smith,<sup>a</sup> Rhodri Ll. Thomas,<sup>a</sup> Edward G. Robins,<sup>a</sup> Jonathan C. Collings,<sup>a</sup> Chaoyang Dai,<sup>b</sup> Andrew J. Scott,<sup>c</sup> Simon Borwick,<sup>a</sup> Andrei S. Batsanov,<sup>\*a</sup> Stephen W. Watt,<sup>d</sup> Stewart J. Clark,<sup>e</sup> Christopher Viney,<sup>d</sup> Judith A.K. Howard,<sup>a</sup> William Clegg,<sup>c</sup> and Todd B. Marder<sup>a\*</sup>

<sup>a</sup>*Department of Chemistry, University of Durham, South Road, Durham, DH1 3LE, UK, Email: Todd.Marder@durham.ac.uk*

<sup>b</sup>*Department of Chemistry, University of Waterloo, Waterloo, Ontario N2L 3G1, Canada.*

<sup>c</sup>*School of Natural Sciences ( Chemistry), University of Newcastle upon Tyne, Newcastle upon Tyne, NE1 7RU, UK.*

<sup>d</sup>*Department of Chemistry, Heriot-Watt University, Riccarton, Edinburgh, EH14 4AS, Scotland.*

<sup>e</sup>*Department of Physics, University of Durham, South Road, Durham DH1 3LE, UK.*

**Details of the spectroscopic characterisation of 4b-k:**

*Compound 4b*: R = Et. Yield: 0.225 g, 89%. m.p. 49–50°C.  $^1\text{H}$  NMR (200 MHz):  $\delta$  1.44 (t,  $^3J_{\text{HH}} = 7.1$  Hz, 3H, O-CH<sub>2</sub>-CH<sub>3</sub>), 4.36 (q,  $^3J_{\text{HH}} = 7.1$  Hz, 2H O-CH<sub>2</sub>-CH<sub>3</sub>), 7.39 (m, 3H, ArH), 7.57 (m, 2H, ArH).  $^{19}\text{F}$ - $\{^1\text{H}\}$  NMR (188 MHz):  $\delta$  -138.3 (m, 2F), -157.8 (m, 2F).  $^{13}\text{C}$ - $\{^1\text{H}\}$  NMR (100 MHz):  $\delta$  15.4 (CH<sub>3</sub>), 71.1 (CH<sub>2</sub>-O), 74.1 (C $\equiv$ C), 98.1 (m, C<sub>Ar</sub>-O), 100.2 (C $\equiv$ C), 122.0 (C<sub>ipso</sub> of phenyl ring), 128.5 (C<sub>Ar</sub>-H) 129.1 (C<sub>Ar</sub>-H), 131.8 (C<sub>Ar</sub>-H), 138.3 (m, C<sub>ipso</sub> of fluoroaryl ring), 141.1 (d of m, C<sub>Ar</sub>-F,  $J_{\text{CF}} = 240$  Hz), 147.3 (d of m, C<sub>Ar</sub>-F  $J_{\text{CF}} = 250$  Hz). MS (EI) m/z (relative intensity): 294 (M<sup>+</sup>, 29), 266 (M<sup>+</sup>-C<sub>2</sub>H<sub>4</sub>, 100). Elemental analysis calculated for C<sub>16</sub>H<sub>10</sub>F<sub>4</sub>O: C 65.31, H 3.43; found: C 64.98, H 3.41.

*Compound 4c*: R = <sup>n</sup>Pr. Yield: 0.243 g, 85%, m.p. 75–75.5°C.  $^1\text{H}$  NMR (200 MHz):  $\delta$  1.05 (t,  $^3J_{\text{HH}} = 7.0$  Hz, 3H, CH<sub>3</sub>-), 1.83 (apparent sext,  $^3J_{\text{HH}} = 7.0$  Hz, 2H, CH<sub>2</sub>-), 4.25 (t,  $^3J_{\text{HH}} = 7.0$  Hz, 2H, O-CH<sub>2</sub>), 7.40 (m, 3H, ArH), 7.60 (m, 2H, ArH).  $^{19}\text{F}$ - $\{^1\text{H}\}$  NMR (188 MHz):  $\delta$  -138.5 (m, 2F), -157.8 (m, 2F).  $^{13}\text{C}$ - $\{^1\text{H}\}$  NMR (63 MHz):  $\delta$  10.0, 23.2 (alkyl), 74.2 (C $\equiv$ C), 77.1 (CH<sub>2</sub>-O), 98.1 (m, C<sub>Ar</sub>-O), 100.1 (C $\equiv$ C), 122.0 (C<sub>ipso</sub> of phenyl ring) 128.4 (C<sub>Ar</sub>-H), 129.2 (C<sub>Ar</sub>-H), 131.8 (C<sub>Ar</sub>-H), 138.2 (m, C<sub>ipso</sub> of fluoroaryl ring) 141.1 (d of m, C<sub>Ar</sub>-F,  $J_{\text{CF}} = 250$  Hz), 147.3 (d of m, C<sub>Ar</sub>-F,  $J_{\text{CF}} = 260$  Hz). MS (EI) m/z (relative intensity): 308 (M<sup>+</sup>, 13), 266 (M<sup>+</sup>-C<sub>3</sub>H<sub>6</sub>, 100). Elemental analysis calculated for C<sub>17</sub>H<sub>12</sub>F<sub>4</sub>O: C 66.23, H 3.92; found: C 65.99, H 3.91.

*Compound 4d*, R = <sup>i</sup>Pr. Yield: 0.211 g, 74%. m.p. 64.2–64.7°C.  $^1\text{H}$  NMR (300 MHz):  $\delta$  1.32 (d,  $^3J_{\text{HH}} = 6.0$  Hz, 6H, CH(CH<sub>3</sub>)<sub>2</sub>), 4.54 (sep,  $^3J_{\text{HH}} = 6.0$  Hz, 1H, CHMe<sub>2</sub>), 7.31 (m, 3H, ArH), 7.51 (m, 2H, ArH).  $^{19}\text{F}$ - $\{^1\text{H}\}$  NMR (188 MHz):  $\delta$  -138.5 (m, 2F), -156.1 (m, 2F). (MS (EI) m/z : 308 (M<sup>+</sup>, 5), 293 (M<sup>+</sup>-Me, 2), 266 (M<sup>+</sup>-C<sub>3</sub>H<sub>6</sub>, 100). Elemental analysis calculated for C<sub>17</sub>H<sub>12</sub>F<sub>4</sub>O: C 66.23, H 3.92; found: C 66.08, H 3.82.

*Compound 4e*, R = <sup>n</sup>Bu. Yield: 0.229 g, 76%. m.p. 31.2–32°C.  $^1\text{H}$  NMR (200 MHz):  $\delta$  0.98 (t,  $^3J_{\text{HH}} = 7.3$  Hz, 3H, CH<sub>3</sub>-), 1.51 (apparent sext,  $^3J_{\text{HH}} = 7.3$  Hz, 2H, -CH<sub>2</sub>-CH<sub>3</sub>), 1.78 (apparent qn,  $^3J_{\text{HH}} = 7.3$  Hz, 2H, CH<sub>2</sub>-CH<sub>2</sub>-CH<sub>3</sub>), 4.27 (t,  $^3J_{\text{HH}} = 6.8$  Hz, 2H, -OCH<sub>2</sub>), 7.38 (m, 3H, ArH), 7.57 (m, 2H, ArH).  $^{19}\text{F}$ - $\{^1\text{H}\}$  NMR (188 MHz):  $\delta$  -138.5 (m, 2F), -157.9 (m, 2F).  $^{13}\text{C}$ - $\{^1\text{H}\}$  NMR (63 MHz):  $\delta$  13.6, 18.7, 31.9 (alkyl), 74.2 (C $\equiv$ C), 75.2 (CH<sub>2</sub>-O), 97.8 (m, C<sub>Ar</sub>-O), 100.1 (C $\equiv$ C), 122.0 (C<sub>ipso</sub> of phenyl ring), 128.4 (C<sub>Ar</sub>-H), 129.2 (C<sub>Ar</sub>-H), 131.8 (C<sub>Ar</sub>-H), 138.3 (m, C<sub>ipso</sub> of fluoroaryl ring), 141.1 (d of m, C<sub>Ar</sub>-F,  $J_{\text{CF}} = 248$  Hz), 147.4 (d of m, C<sub>Ar</sub>-F,  $J_{\text{CF}} = 254$  Hz). MS (EI) m/z (relative intensity): 322 (M<sup>+</sup>, 10), 266 (M<sup>+</sup> - C<sub>4</sub>H<sub>8</sub>, 100). Elemental analysis calculated for C<sub>18</sub>H<sub>14</sub>F<sub>4</sub>O: C 67.08, H 4.38; found: C 66.79, H 4.42.

*Compound 4f*, R = *n*-C<sub>5</sub>H<sub>11</sub>. Yield: 0.312 g, 68%. m.p. 27–27.5°C. <sup>1</sup>H NMR (200 MHz): δ 0.94 (t, <sup>3</sup>J<sub>HH</sub> = 7.0 Hz, 3H, CH<sub>3</sub>-), 1.41 (m, 4H, -CH<sub>2</sub>-CH<sub>3</sub> and CH<sub>2</sub>-CH<sub>2</sub>-CH<sub>3</sub>), 1.80 (m, 2H, CH<sub>2</sub>-CH<sub>2</sub>-CH<sub>2</sub>-CH<sub>3</sub>), 4.27 (t, <sup>3</sup>J<sub>HH</sub> = 6.5 Hz, 2H, O-CH<sub>2</sub>), 7.38 (m, 3H, ArH), 7.57 (m, 2H, ArH). <sup>19</sup>F-<sup>1</sup>H NMR (188 MHz): δ -138.5 (m, 2F), -157.8 (m, 2F). <sup>13</sup>C-<sup>1</sup>H NMR (63 MHz): δ 13.9, 22.7, 27.6, 29.6 (alkyl), 74.16 (C≡C), 75.46 (CH<sub>2</sub>-O), 98.0 (m, C<sub>Ar</sub>-O), 100.1 (C≡C), 122.0 (C<sub>ipso</sub> of phenyl ring), 128.4 (C<sub>Ar</sub>-H), 129.2 (C<sub>Ar</sub>-H), 131.8 (C<sub>Ar</sub>-H), 138.2 (m, C<sub>ipso</sub> of fluoroaryl ring), 141.2 (d of m, C<sub>Ar</sub>-F, J<sub>CF</sub> = 248 Hz) 147.2 (d of m, C<sub>Ar</sub>-F, J<sub>CF</sub> = 263 Hz). MS (EI) m/z (relative intensity): 336 (M<sup>+</sup>, 7), 266 (M<sup>+</sup> - C<sub>5</sub>H<sub>10</sub>, 100). Elemental analysis calculated for C<sub>19</sub>H<sub>16</sub>F<sub>4</sub>O: C 67.85, H 4.79; found: C 68.05, H 4.89.

*Compound 4g*, R = PhCH<sub>2</sub> (Bz). Gentle heat was applied (40°C water bath for 1.5 h) to drive the reaction to completion. Yield: 0.204 g, 61%. m.p. 126.5–128°C. <sup>1</sup>H NMR (200 MHz): δ 5.30 (s, 2H, -CH<sub>2</sub>O), 7.37-7.42 (m, 8H, ArH), 7.56 (m, 2H, ArH). <sup>19</sup>F-<sup>1</sup>H (188 MHz): δ -138.3 (m, 2F), -156.6 (m, 2F). <sup>13</sup>C-<sup>1</sup>H NMR (63 MHz): δ 74.1 (CH<sub>2</sub>-O), 77.2 (C≡C), 98.6 (m, C<sub>Ar</sub>-O), 100.4 (C≡C), 121.9 (C<sub>ipso</sub> of phenyl ring), 128.3 (C<sub>Ar</sub>-H), 128.4 (C<sub>Ar</sub>-H), 128.7 (C<sub>Ar</sub>-H), 128.9 (C<sub>Ar</sub>-H), 129.2 (C<sub>Ar</sub>-H), 131.8 (C<sub>Ar</sub>-H), 135.3 (C<sub>ipso</sub> of phenyl ring), 137.2 (m, C<sub>ipso</sub> of fluoroaryl ring), 141.3 (d of m, C<sub>Ar</sub>-F, J<sub>CF</sub> = 246 Hz), 147.1 (d of m, C<sub>Ar</sub>-F, J<sub>CF</sub> = 258 Hz). MS (EI) m/z (relative intensity): 356 (M<sup>+</sup>, 3), 265 (M<sup>+</sup>-CH<sub>2</sub>Ph, 3), 91 (PhCH<sub>2</sub><sup>+</sup>, 100). Elemental analysis calculated for C<sub>21</sub>H<sub>12</sub>F<sub>4</sub>O: C 70.79, H 3.39; found: C 71.11, H 3.48.

*Compound 4h*, R = Ph(CH<sub>2</sub>)<sub>2</sub>. Yield: 0.188 g, 55%. m.p. 72–73°C. <sup>1</sup>H NMR (200 MHz): δ 3.12 (t, <sup>3</sup>J<sub>HH</sub> = 7.0 Hz, 2H, CH<sub>2</sub>Ph), 4.49 (t, <sup>3</sup>J<sub>HH</sub> = 7.0 Hz, 2H, O-CH<sub>2</sub>), 7.25 – 7.40 (m, 7H, Ar-H), 7.55 – 7.60 (m, 3H, Ar-H). <sup>19</sup>F-<sup>1</sup>H NMR (188 MHz): δ -138.3 (m, 2F), -158.6 (m, 2F). <sup>13</sup>C-<sup>1</sup>H NMR (63 MHz): δ 36.4 (CH<sub>2</sub>-Ph), 74.0 (C≡C), 75.5 (CH<sub>2</sub>-O), 98.1 (m, C<sub>Ar</sub>-O), 100.2 (C≡C), 121.9 (C<sub>ipso</sub> of phenyl ring), 126.8 (C<sub>Ar</sub>-H), 128.4 (C<sub>Ar</sub>-H), 128.6 (C<sub>Ar</sub>-H), 128.9 (C<sub>Ar</sub>-H), 129.3 (C<sub>Ar</sub>-H), 131.8 (C<sub>Ar</sub>-H), 137.0 (C<sub>ipso</sub> of phenyl ring), 137.9 (m, C<sub>ipso</sub> of fluoroaryl ring), 140.9 (d of m, C<sub>Ar</sub>-F, J<sub>CF</sub> = 258 Hz), 147.4 (d of m, C<sub>Ar</sub>-F, J<sub>CF</sub> = 264 Hz). MS (EI) m/z (relative intensity): 370 (M<sup>+</sup>, 100), 266 (M<sup>+</sup> - CH<sub>2</sub>CHPh, 35), 105 (PhCH<sub>2</sub>CH<sub>2</sub><sup>+</sup>, 92). Elemental analysis calculated for C<sub>22</sub>H<sub>14</sub>F<sub>4</sub>O: C 71.35, H 3.81; found: C 70.88, H 3.80.

*Compound 4i*, R = 4-CH<sub>3</sub>C<sub>6</sub>H<sub>4</sub>. Yield: 0.272 g, 82%. m.p. 85–86.5°C. <sup>1</sup>H NMR (200 MHz): δ 2.56 (s, 3H, Ph-CH<sub>3</sub>), 6.82 (m, 2H, ArH), 7.56 (m, 2H, ArH), 7.50 – 7.55 (m, 5H, ArH). <sup>19</sup>F-<sup>1</sup>H NMR (188 MHz): δ -137.3 (m, 2F), -154.9 (m, 2F). <sup>13</sup>C-<sup>1</sup>H NMR (100 MHz): δ 20.6 (CH<sub>3</sub>), 73.8 (C≡C), 100.8 (m, C<sub>Ar</sub>-O), 101.2 (C≡C), 115.5 (C<sub>Ar</sub>-H), 121.8 (C<sub>ipso</sub> of phenyl ring), 128.5 (C<sub>Ar</sub>-H), 129.5 (C<sub>Ar</sub>-H), 130.2 (C<sub>Ar</sub>-H), 131.9 (C<sub>Ar</sub>-H), 133.5 (C<sub>Ar</sub>-Me), 134.4 (m, C<sub>ipso</sub> of fluoroaryl ring), 141.6 (d of m, C<sub>Ar</sub>-F, J<sub>CF</sub> = 250 Hz), 147.4 (d of m, C<sub>Ar</sub>-F,

$J_{CF} = 240$  Hz), 155.1 ( $C_{Ar-O}$ ). MS (EI)  $m/z$  (relative intensity): 356 ( $M^+$ , 100), 265 ( $M^+ - C_6H_4Me$ , 21), 91 ( $C_6H_4Me^+$ , 80). Elemental analysis calculated for  $C_{21}H_{12}F_4O$ : C 70.79, H 3.39; found: C 70.68, H 3.67.

**Compound 4j**, R = 4-Et $C_6H_4$ . Yield: 0.276 g, 80%. m.p. 99.5-101 °C.  $^1H$  NMR (200 MHz):  $\delta$  1.23 (t,  $^3J_{HH} = 7.5$  Hz, 3H,  $CH_2-CH_3$ ), 2.63 (q,  $^3J_{HH} = 7.5$  Hz, 2H,  $CH_2-CH_3$ ), 6.91 (m, 2H, ArH), 7.16 (m, 2H, ArH), 7.41 (m, 3H, ArH), 7.60 (m, 2H, ArH).  $^{19}F$ - $\{^1H\}$  NMR (188 MHz):  $\delta$  -137.3 (m, 2F), -154.9 (m, 2F).  $^{13}C$ - $\{^1H\}$  NMR (100 MHz):  $\delta$  15.6, 28.0 (alkyl), 73.8 ( $C\equiv C$ ), 100.7 (m,  $C_{Ar-O}$ ), 101.3 ( $C\equiv C$ ), 115.5 ( $C_{Ar-H}$ ), 121.8 ( $C_{ipso}$  of phenyl ring), 128.5 ( $C_{Ar-H}$ ), 129.1 ( $C_{Ar-H}$ ), 129.5 ( $C_{Ar-H}$ ), 131.9 ( $C_{Ar-H}$ ), 134.4 (m,  $C_{ipso}$  of fluoroaryl ring), 139.4 ( $C_{Ar-Et}$ ), 141.6 (d of m,  $C_{Ar-F}$ ,  $J_{CF} = 240$  Hz), 147.4 (d of m,  $C_{Ar-F}$ ,  $J_{CF} = 240$  Hz), 155.2 ( $C_{Ar-O}$ ). MS (EI)  $m/z$  (relative intensity): 370 ( $M^+$ , 82), 355 ( $M^+ - CH_3$ , 100), 265 ( $M^+ - PhEt$  and  $-H$ , 19). Elemental analysis calculated for  $C_{22}H_{14}F_4O$ : C 71.35, H 3.81; found: C 71.76, H 4.24.

**Compound 4k**, OR = (1R, 2S, 5R)-(-)-menthoxy: Initially obtained as colourless oil, which solidified over extended period of time. Yield: 0.287 g, 76%. m.p 48-49 °C.  $^1H$  NMR (300 MHz):  $\delta$  0.86 (d,  $^3J_{HH} = 7.0$  Hz, 3H,  $CH(CH_3)_2$ ), 0.91 (d,  $^3J_{HH} = 7.0$  Hz, 3H,  $CH(CH_3)_2$ ), 0.97 (d,  $^3J_{HH} = 4.8$  Hz, 3H,  $CH_3$ ), 1.06 (br d,  $J_{HH} = 12.8$  Hz, 1H  $H_{ring}$ ), 1.14 (br d,  $J_{HH} = 8.2$  Hz, 1H,  $H_{ring}$ ), 1.25 (br s, 1H,  $H_{ring}$ ), 1.57 (br t,  $J_{HH} = 8.8$  Hz, 1H,  $H_{ring}$ ), 1.68 (br s, 1H,  $H_{ring}$ ), 1.71 (br s, 1H,  $H_{ring}$ ), 1.76 (apparent q,  $J_{HH} = 2.4$  Hz,  $H_{ring}$ ), 1.92 (br d,  $J_{HH} = 7.8$  Hz, 1H,  $H_{ring}$ ), 2.39 (apparent sept of d,  $^3J_{HH} = 7.0$  Hz,  $^3J_{HH} = 2.5$  Hz, 1H,  $CH(CH_3)_2$ ), 4.20 (apparent t of d,  $^3J_{HH} = 10.4$  Hz,  $^3J_{HH} = 4.2$  Hz, 1H,  $CH-O$ ), 7.38 (m, 3H, ArH), 7.58 (m, 2H, ArH) (assigned with the help of ref. 24)  $^{19}F$ - $\{^1H\}$  NMR (188 MHz):  $\delta$  -138.7 (m, 2F), -156.3 (m, 2F).  $^{13}C$ - $\{^1H\}$  NMR (100 MHz):  $\delta$  15.9, 20.9, 22.0, 23.1, 25.7, 31.4, 34.1, 40.6, 48.4 (alkyl), 74.3 ( $C\equiv C$ ), 84.6 ( $CH-O$ ), 98.1 (m,  $C_{Ar-O}$ ), 100.1 ( $C\equiv C$ ), 122.0 ( $C_{ipso}$  of phenyl ring), 128.4 ( $C_{Ar-H}$ ), 129.2 ( $C_{Ar-H}$ ), 131.8 ( $C_{Ar-H}$ ), 137.0 (m,  $C_{ipso}$  of fluoroaryl ring), 141.7 (d of m,  $C_{Ar-F}$ ,  $J_{CF} = 240$  Hz), 147.2 (d of m,  $C_{Ar-F}$ ,  $J_{CF} = 260$  Hz), MS (EI)  $m/z$  (relative intensity): 404 ( $M^+$ , <1), 293 ( $M^+ - C_3H_7$ , 2), 266 ( $M^+ - C_{10}H_{18}$ , 100). Elemental analysis calculated for  $C_{24}H_{24}F_4O$ : C 71.27, H 5.98; found: C 71.51, H 6.16.

### 1,2,3,4,5-Pentafluorophenyl Tolan

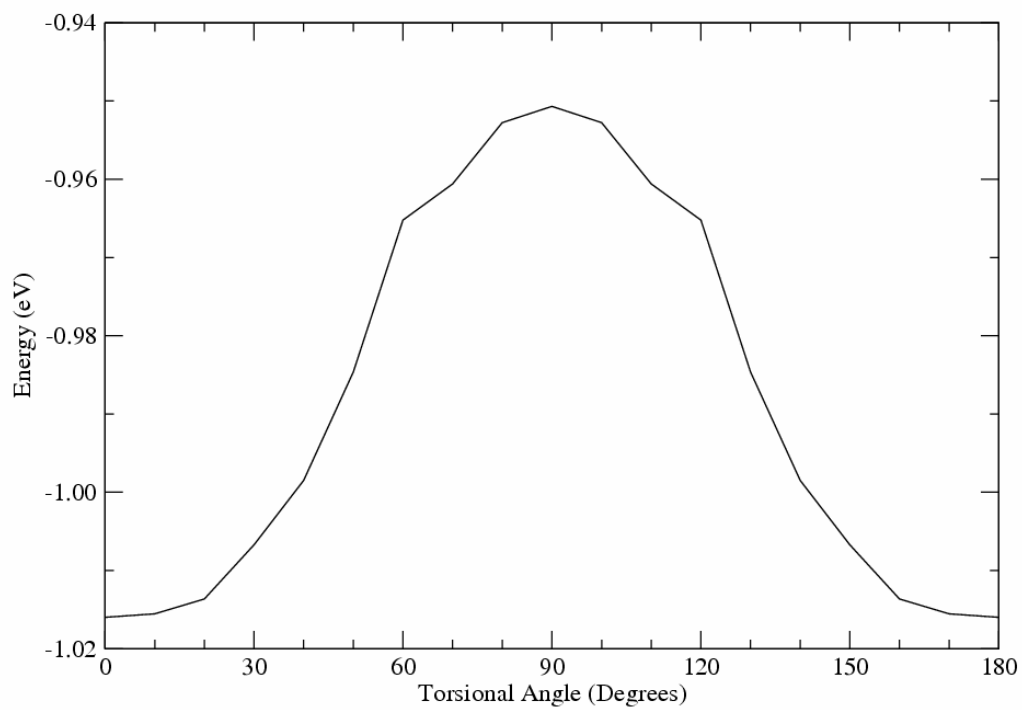

Figure S1: Energy as a function of inter-ring torsion angle in 1,2,3,4,5-pentafluoro tolan.

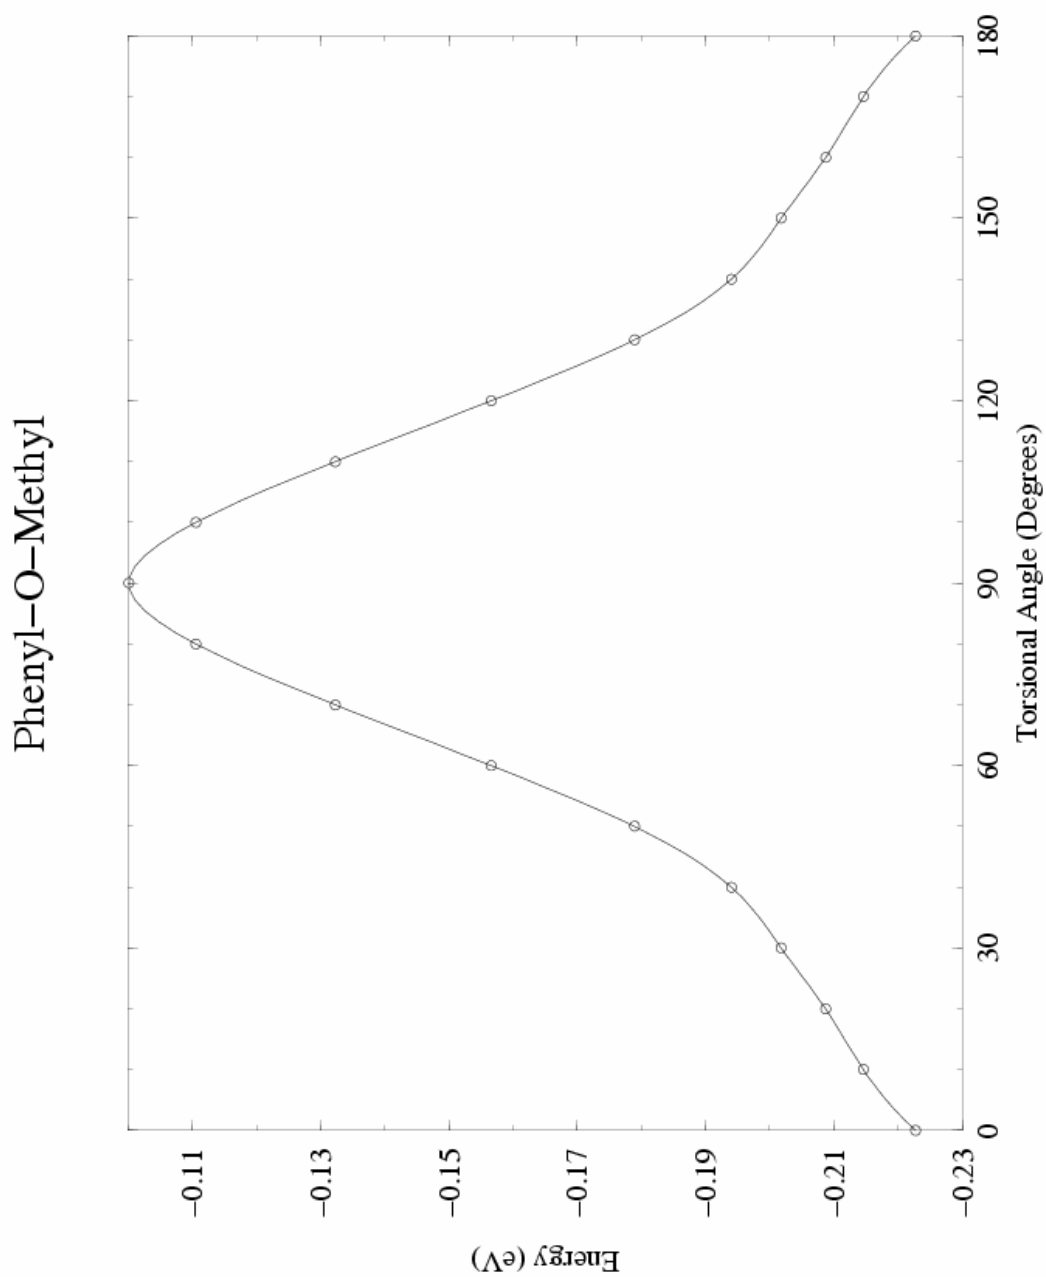

Figure S2: Energy as a function of C(Ph)-C(Ph)-O-C(Me) torsion angle in Ph-O-Me.
